# Supplementary material for: Remote monitoring of seismic swarms and the August 2016 seismic crisis of Brava, Cape Verde, using array methods
Source: Copernicus journal article supplement (doi:10.5194/nhess-2020-225), 2020-08-03
Supplement: Supplementary file 1 [file nhess-2020-225-supplement.pdf]

## S1 Array configuration and array transfer function

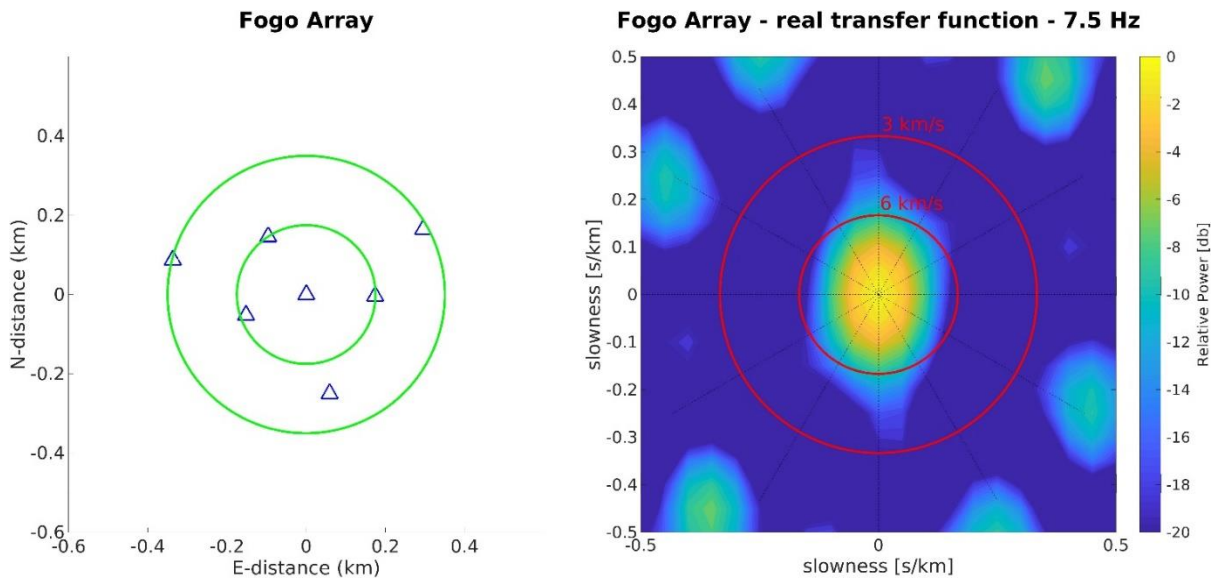

**Figure S1:** Left: configuration of the array which was operated from October 2015 to December 2016. Green circles: diameter of 700 m and 350 m. Triangles: short period 4.5-Hz geophone stations. Right: resulting array transfer function for signals with a frequency of 7.5 Hz. Red circles: apparent velocities of 3 km/s and 6 km/s which represent the range of expected apparent velocities of incoming wavefronts from local events

## S2 Network configuration of the follow-up study from Jan. 2017 – Jan. 2018

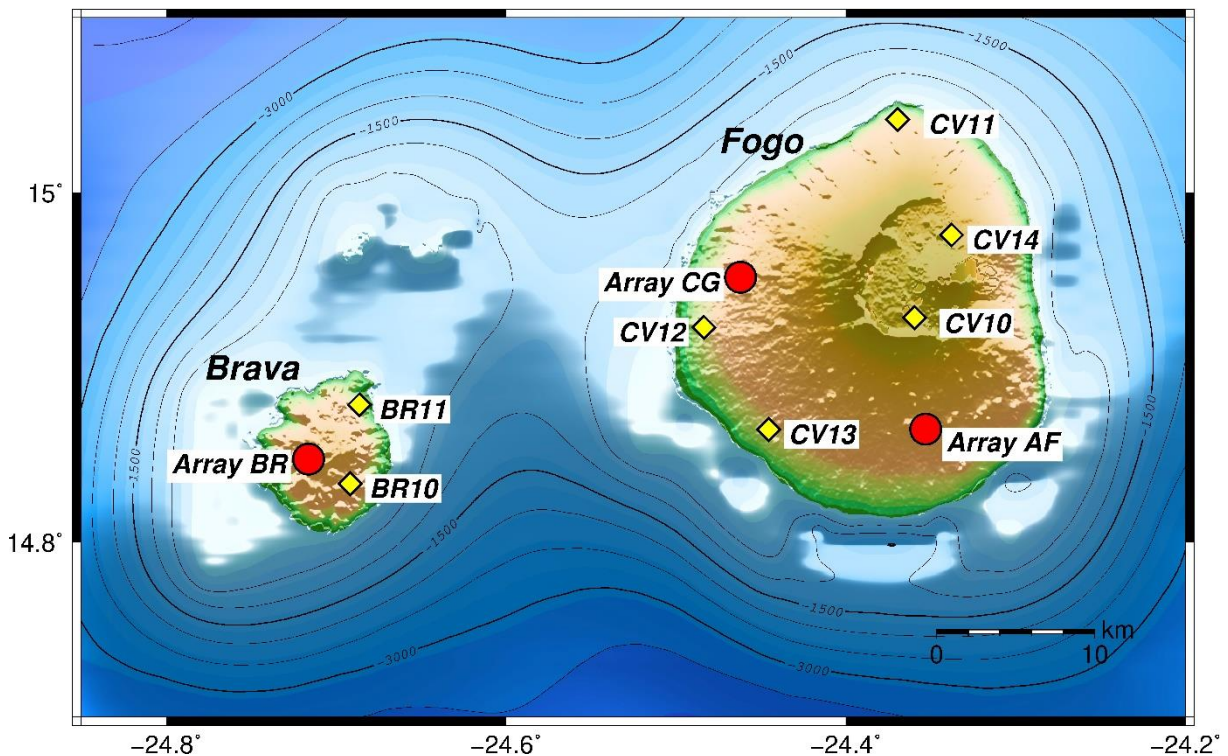

**Figure S2:** Station setup of the main study from January 2017 to January 2018. Red circles: arrays, yellow diamonds: short-period single stations. Topographic and bathymetry data are from Ryan et al. (2009).

### **S3 Aberration vectors of the array AF**

To determine the aberration of the array used during the pilot study from October 2015 to December 2016, it is necessary to compare slowness and backazimuth values to those from earthquakes with otherwise known locations (e.g. Schweitzer et al., 2012). In our main study in 2017 we installed two arrays on Fogo, one on Brava and additionally seven short-period single stations (five on Fogo, two on Brava). Each array was equipped with four broadband Trillium Compact sensors and six 4.5 Hz geophones. The array AF (Fig. S2) is located and shaped in the same way as the array used during the pilot study. To draw conclusions on the aberration of the array of the pilot study, it is thus useful to determine the aberration of array AF. We are especially interested in deducing the possible aberrations with respect to the slowness determination of events within our study area around Brava.

For this purpose, we use the whole network of 2017 to locate events within the network, where the standard localization method based on the code HYPOCENTER (Lienert et al., 1986), can be applied. Additionally, the error and rms of the standard localization analysis must not exceed a certain level to ensure a sufficiently precise localization of the related event. These criteria are applied to 13 events from January 2017 to December 2017 for which the backazimuth and slowness values were determined. The slowness can be estimated using the velocity model of Vales et al. (2014) for Cape Verde that we modified so that the velocity increases in 0.1 km steps with depth. The angle of incidence at the source for each station is provided by the localization code. Now the ray path is estimated by applying Snell's law, until it reaches the ray turning point. The velocity at this depth corresponds to the apparent velocity determined from the array analysis ( $v_a = 1/|s|$ ).

Figure S3 shows the resulting aberration vectors. For events originating beneath Brava, the vectors show a mean deviation of the backazimuth of about  $6.5^\circ$  to the south.

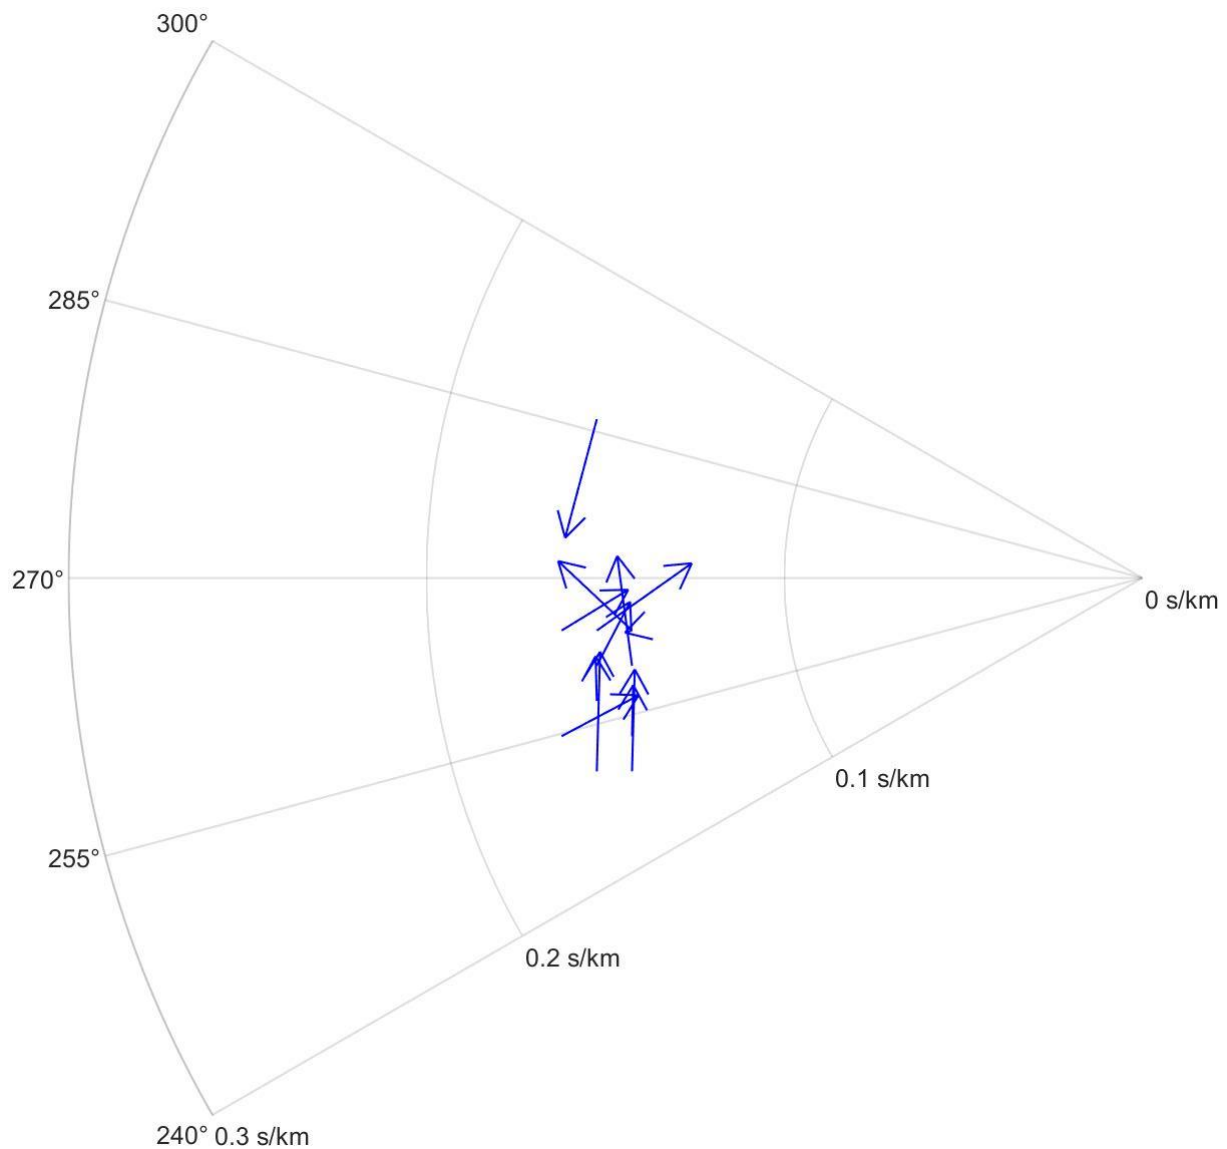

**Figure S3:** Aberration vectors of array AF deployed from January 2017 to January 2018 during the main study. Shape and location are the same for the array of the pilot study. Vectors are pointing from the backazimuth and slowness values of the array analysis to the respective values of the standard localization.

## References

- Ryan, W. B. F., Carbotte, S. M., Coplan, J. O., O'Hara, S., Melkonian, A., Arko, R., Weissen, R. A., Ferrini, V., Goodwillie, A., Nitsche, F., Bonczkowski, J., and Zemsky, R.: Global Multi-Resolution Topography synthesis, *Geochem. Geophys. Geosy.*, 10, Q03014, doi:10.1029/2008GC002332, 2009.
- Schweitzer, J., Fyen, J., Mykkeltveit, S., Gibbons, S. J., Pirli, M., Kühn, D., and Kväerna, T.: Seismic Arrays, in: Bormann, P. (Ed.), *New Manual of Seismological Observatory Practice 2 (NMSOP-2)*, Potsdam: Deutsches GeoForschungsZentrum GFZ, 1–80, doi:10.2312/GFZ.NMSOP-2\_ch9, 2012.

## S4 Table of results from the array analysis

Table S1: Table of analyzed events of 2015

| Date<br>[yyymmdd] | Time<br>[hh:mm] | Lat.<br>[°] | Long.<br>[°] | Mag.    | Backaz.<br>[°] | Backaz.<br>error<br>[°] | app.<br>velocity<br>[km/s] | Vel.<br>error<br>[km/s] | Dist.<br>[km] | Dist.<br>error<br>[km] |
|-------------------|-----------------|-------------|--------------|---------|----------------|-------------------------|----------------------------|-------------------------|---------------|------------------------|
| 151008            | 20:05           | 14.8015     | -24.7561     | 2.6912  | 260.8624       | 14.3628                 | 6.4776                     | 0.725                   | 44.1039       | 4.4104                 |
| 151008            | 21:49           | 14.8503     | -24.7601     | 1.2976  | 267.9124       | 27.3748                 | 7.5284                     | 1.308                   | 43.9941       | 4.3994                 |
| 151009            | 01:37           | 14.7067     | -24.7213     | 0.78958 | 246.2681       | 13.9755                 | 7.4485                     | 1.2182                  | 43.4916       | 4.3492                 |
| 151009            | 02:16           | 14.5757     | -24.0848     | 0.76348 | 138.0687       | 8.4536                  | 3.8793                     | 0.7477                  | 43.0265       | 4.3026                 |
| 151009            | 02:42           | 14.7759     | -24.7568     | 2.079   | 257.298        | 14.7104                 | 6.4003                     | 0.6477                  | 44.7199       | 4.4720                 |
| 151009            | 04:19           | 14.7973     | -24.7554     | 0.96772 | 260.2436       | 15.6979                 | 6.9121                     | 1.1039                  | 44.1067       | 4.4107                 |
| 151009            | 21:54           | 14.9318     | -24.7494     | 0.935   | 279.8193       | 7.8109                  | 6.9108                     | 0.512                   | 43.434        | 4.3434                 |
| 151009            | 22:14           | 14.9276     | -24.7501     | 0.70821 | 279.1967       | 7.3178                  | 6.4765                     | 0.5328                  | 43.4323       | 4.3432                 |
| 151009            | 23:20           | 14.9328     | -24.7553     | 1.2006  | 279.8193       | 7.9404                  | 6.9108                     | 0.576                   | 44.0783       | 4.4078                 |
| 151010            | 00:50           | 14.9352     | -24.7698     | 0.94533 | 279.8193       | 7.8109                  | 6.9108                     | 0.512                   | 45.6607       | 4.8026                 |
| 151010            | 01:43           | 14.9057     | -24.7553     | 1.0926  | 275.9415       | 4.5899                  | 6.9759                     | 0.5522                  | 43.6721       | 4.3672                 |
| 151010            | 01:44           | 14.9058     | -24.757      | 1.4635  | 275.9415       | 7.6669                  | 6.9759                     | 0.5771                  | 43.8551       | 4.3855                 |
| 151010            | 19:48           | 14.9058     | -24.7565     | 1.2216  | 275.9415       | 7.6669                  | 6.9759                     | 0.5522                  | 43.8016       | 4.3802                 |
| 151011            | 03:35           | 14.9303     | -24.7407     | 0.95686 | 279.8193       | 7.9404                  | 6.9108                     | 0.6113                  | 42.4834       | 4.2483                 |
| 151011            | 20:50           | 14.9053     | -24.7511     | 0.98615 | 275.9415       | 7.6669                  | 6.9759                     | 0.5522                  | 43.218        | 4.3218                 |
| 151012            | 03:03           | 14.9045     | -24.7439     | 1.213   | 275.9415       | 7.6669                  | 6.9759                     | 0.5522                  | 42.4383       | 4.2438                 |
| 151012            | 22:37           | 14.9805     | -24.7341     | 0.98539 | 287.2802       | 11.3387                 | 6.697                      | 0.7095                  | 43.0859       | 4.3086                 |
| 151012            | 22:46           | 14.9322     | -24.7523     | 1.6707  | 279.8193       | 7.8109                  | 6.9108                     | 0.576                   | 43.749        | 4.3749                 |
| 151012            | 23:01           | 14.9311     | -24.7455     | 1.0187  | 279.8193       | 7.8109                  | 6.9108                     | 0.6173                  | 43.0074       | 4.3007                 |
| 151012            | 23:07           | 14.9318     | -24.7495     | 1.0018  | 279.8193       | 7.4609                  | 6.9108                     | 0.6113                  | 43.4446       | 4.3445                 |
| 151012            | 23:33           | 14.9339     | -24.762      | 0.88845 | 279.8193       | 7.9404                  | 6.9108                     | 0.512                   | 44.8093       | 4.4809                 |
| 151013            | 03:48           | 14.906      | -24.7586     | 1.2571  | 275.9415       | 7.6669                  | 6.9759                     | 0.5522                  | 44.0287       | 4.4029                 |
| 151013            | 09:26           | 14.905      | -24.7485     | 1.1138  | 275.9415       | 8.0291                  | 6.9759                     | 0.5525                  | 42.9363       | 4.2936                 |
| 151013            | 20:59           | 14.9313     | -24.7464     | 1.1709  | 279.8193       | 11.9069                 | 6.9108                     | 0.6176                  | 43.1065       | 4.3107                 |
| 151014            | 00:22           | 14.8779     | -24.7624     | 0.77644 | 271.8789       | 10.8808                 | 6.5573                     | 0.9711                  | 44.2305       | 4.4230                 |
| 151014            | 03:55           | 14.9052     | -24.7508     | 0.86015 | 275.9415       | 7.8852                  | 6.9759                     | 0.5771                  | 43.1847       | 4.3185                 |
| 151014            | 05:05           | 14.9322     | -24.7521     | 1.5072  | 279.8193       | 7.8109                  | 6.9108                     | 0.576                   | 43.7278       | 4.3728                 |
| 151015            | 00:09           | 14.7983     | -24.7491     | 0.97899 | 260.2436       | 29.799                  | 6.9121                     | 1.2149                  | 43.4195       | 4.3420                 |
| 151015            | 00:42           | 14.9278     | -24.752      | 0.88049 | 279.1967       | 11.1404                 | 6.4765                     | 0.7793                  | 43.6377       | 4.3638                 |
| 151015            | 00:43           | 14.9281     | -24.7536     | 0.79098 | 279.1967       | 7.0286                  | 6.4765                     | 0.7793                  | 43.8129       | 4.3813                 |
| 151015            | 00:48           | 14.9276     | -24.7503     | 0.65017 | 279.1967       | 7.0286                  | 6.4765                     | 0.8497                  | 43.4536       | 4.3454                 |
| 151019            | 16:41           | 14.7997     | -24.7413     | 2.4001  | 260.2436       | 8.6577                  | 6.9121                     | 1.0672                  | 42.5657       | 4.2566                 |
| 151020            | 15:38           | 16.7926     | -25.8821     | 3.1681  | 322.6562       | 14.1992                 | 9.4972                     | 2.7743                  | 269.011       | 26.9011                |
| 151021            | 06:43           | 14.8009     | -24.7337     | 2.093   | 260.2436       | 11.6353                 | 6.9121                     | 0.7741                  | 41.737        | 4.1737                 |
| 151021            | 06:44           | 14.7846     | -24.6943     | 1.8506  | 256.4528       | 10.1847                 | 6.8184                     | 0.8381                  | 37.9492       | 3.7949                 |
| 151021            | 09:15           | 14.7997     | -24.7407     | 2.1551  | 260.2436       | 8.0483                  | 6.9121                     | 0.7741                  | 42.5021       | 4.2502                 |
| 151021            | 14:29           | 14.8291     | -24.7333     | 1.2007  | 264.4996       | 8.0468                  | 6.5306                     | 0.4461                  | 41.2744       | 4.1274                 |
| 151023            | 02:51           | 14.9091     | -24.759      | 1.0044  | 276.3784       | 10.9018                 | 7.4868                     | 1.3491                  | 44.1076       | 4.4108                 |
| 151029            | 13:08           | 14.9389     | -24.7313     | 1.0562  | 281.3409       | 9.6767                  | 5.6972                     | 0.8601                  | 41.662        | 4.1662                 |
| 151031            | 01:03           | 14.8778     | -24.7589     | 1.4432  | 271.8789       | 7.7563                  | 6.5573                     | 0.8054                  | 43.8537       | 4.3854                 |
| 151106            | 07:01           | 14.907      | -24.7686     | 1.0256  | 275.9415       | 27.2905                 | 6.9759                     | 1.795                   | 45.1103       | 4.5110                 |
| 151111            | 20:53           | 14.9691     | -24.3004     | 0.90109 | 25.5773        | 14.2385                 | 7.9664                     | 3.0776                  | 12.7512       | 1.2751                 |
| 151113            | 04:07           | 14.8771     | -24.7089     | 2.0818  | 272.0084       | 15.2718                 | 7.0093                     | 1.3121                  | 38.4734       | 3.8473                 |
| 151114            | 06:43           | 14.8758     | -24.7407     | 2.2448  | 271.6642       | 7.1646                  | 5.8082                     | 0.7224                  | 41.8895       | 4.1890                 |
| 151114            | 20:28           | 14.8779     | -24.7624     | 1.8133  | 271.8789       | 11.6353                 | 6.5573                     | 0.9305                  | 44.2305       | 4.4230                 |
| 151115            | 03:18           | 14.8276     | -24.7495     | 1.4035  | 264.4996       | 9.0099                  | 6.5306                     | 0.7625                  | 43.026        | 4.3026                 |
| 151115            | 05:32           | 14.874      | -24.6721     | 1.2423  | 271.6642       | 10.8018                 | 5.8082                     | 0.7493                  | 34.5046       | 3.4505                 |
| 151115            | 12:06           | 14.942      | -24.7475     | 1.0414  | 281.3409       | 6.4129                  | 5.6972                     | 0.4402                  | 43.4383       | 4.3438                 |
| 151115            | 21:24           | 14.8272     | -24.7782     | 1.0812  | 264.8312       | 12.0523                 | 6.138                      | 0.7741                  | 46.1055       | 4.6105                 |
| 151116            | 05:00           | 14.8365     | -24.6749     | 1.0763  | 264.8312       | 8.3784                  | 6.138                      | 0.7741                  | 34.9393       | 3.4939                 |
| 151124            | 02:34           | 14.8767     | -24.7748     | 1.2115  | 271.6642       | 10.8018                 | 5.8082                     | 1.1685                  | 45.5604       | 4.5560                 |
| 151124            | 03:47           | 14.8761     | -24.7255     | 0.439   | 271.765        | 11.5214                 | 6.1601                     | 0.8494                  | 40.2554       | 4.0255                 |
| 151127            | 02:11           | 14.9429     | -24.609      | 0.99688 | 287.2802       | 11.3387                 | 6.697                      | 1.3574                  | 29.0005       | 2.9001                 |
| 151202            | 19:40           | 14.8367     | -24.6538     | 1.2127  | 264.4996       | 10.4284                 | 6.5306                     | 0.7414                  | 32.6763       | 3.2676                 |
| 151203            | 01:47           | 14.9173     | -24.7061     | 2.2131  | 278.6477       | 10.5914                 | 6.093                      | 0.9165                  | 38.5795       | 3.8580                 |
| 151203            | 01:53           | 14.9201     | -24.3286     | 1.0216  | 22.184         | 5.975                   | 6.9673                     | 0.7914                  | 6.5627        | 0.6563                 |
| 151203            | 22:11           | 14.8791     | -24.8011     | 1.2224  | 271.8789       | 11.6353                 | 6.5573                     | 0.8601                  | 48.3971       | 4.8397                 |
| 151204            | 18:26           | 14.9048     | -24.7464     | 1.7075  | 275.9415       | 17.8533                 | 6.9759                     | 2.613                   | 42.7093       | 4.2709                 |

|        |       |         |          |         |          |         |        |        |         |         |
|--------|-------|---------|----------|---------|----------|---------|--------|--------|---------|---------|
| 151206 | 23:28 | 14.8777 | -24.7549 | 1.0639  | 271.8789 | 11.6353 | 6.5573 | 0.8601 | 43.4231 | 4.3423  |
| 151207 | 07:24 | 14.8777 | -24.7821 | 2.0435  | 271.765  | 7.2654  | 6.1601 | 0.4082 | 46.3488 | 4.6349  |
| 151207 | 07:27 | 14.8518 | -24.7726 | 0.77059 | 268.1817 | 7.9381  | 6.5575 | 0.7683 | 45.3325 | 4.5333  |
| 151208 | 23:04 | 14.9005 | -24.7526 | 1.1308  | 275.2252 | 7.0435  | 6.1374 | 0.4402 | 43.3279 | 4.3328  |
| 151209 | 04:08 | 14.919  | -24.7179 | 1.2286  | 278.6477 | 10.5914 | 6.093  | 0.9165 | 39.863  | 3.9863  |
| 151210 | 09:44 | 14.7298 | -24.965  | 2.0338  | 257.298  | 9.4467  | 6.4003 | 0.7474 | 67.7104 | 6.7710  |
| 151211 | 18:29 | 14.964  | -24.7124 | 1.4065  | 285.7798 | 10.8518 | 5.018  | 0.7712 | 40.3304 | 4.0330  |
| 151217 | 13:29 | 16.0858 | -24.1704 | 2.6678  | 8.1676   | 10.2527 | 9.5743 | 2.6901 | 136.459 | 13.6459 |

*Table S2: Table of analyzed events of 2016*

| Date<br>[yyymmdd] | Time<br>[hh:mm] | Lat.<br>[°] | Long.<br>[°] | Mag.    | Backaz.<br>[°] | Backaz<br>error<br>[°] | app.<br>velocity<br>[km/s] | Vel.<br>error<br>[km/s] | Dist.<br>[km] | Dist.<br>error<br>[km] |
|-------------------|-----------------|-------------|--------------|---------|----------------|------------------------|----------------------------|-------------------------|---------------|------------------------|
| 160116            | 3:09            | 14.672      | -24.6543     | 1.4976  | 236.7761       | 14.806                 | 5.8671                     | 0.7598                  | 38.9734       | 6.9558                 |
| 160118            | 0:34            | 14.9142     | -24.7729     | 1.4039  | 276.8843       | 8.8026                 | 8.0778                     | 1.1670                  | 45.6576       | 4.5658                 |
| 160118            | 2:05            | 14.8521     | -24.764      | 0.93686 | 268.1817       | 4.0591                 | 6.5575                     | 0.4520                  | 44.4064       | 4.4406                 |
| 160120            | 5:47            | 14.738      | -24.7666     | 1.6383  | 252.5696       | 6.7372                 | 5.5439                     | 0.6989                  | 46.8377       | 4.6838                 |
| 160128            | 5:22            | 14.8755     | -24.75       | 2.1411  | 271.5742       | 6.1502                 | 5.4944                     | 0.3140                  | 42.8891       | 4.2889                 |
| 160204            | 23:09           | 14.8004     | -24.7893     | 1.0011  | 261.408        | 4.11                   | 6.0939                     | 0.3956                  | 47.6531       | 4.7653                 |
| 160206            | 3:36            | 14.8219     | -24.6624     | 0.85187 | 261.8925       | 7.1283                 | 5.7526                     | 1.1595                  | 33.7917       | 3.3792                 |
| 160207            | 4:18            | 14.8524     | -24.802      | 1.3502  | 268.3895       | 6.497                  | 5.8084                     | 0.5957                  | 48.493        | 4.8493                 |
| 160207            | 4:23            | 14.8253     | -24.7994     | 1.0784  | 264.8312       | 14.3505                | 6.1380                     | 0.6435                  | 48.397        | 4.8397                 |
| 160207            | 5:09            | 14.7129     | -24.7509     | 0.71416 | 248.651        | 15.0394                | 8.2376                     | 1.0899                  | 46.1703       | 4.6170                 |
| 160207            | 6:28            | 14.7847     | -24.7876     | 0.6657  | 259.3068       | 6.0809                 | 5.4010                     | 0.3516                  | 47.767        | 4.7767                 |
| 160207            | 7:23            | 14.8525     | -24.7976     | 1.263   | 268.3895       | 6.9815                 | 5.8084                     | 0.3519                  | 48.0193       | 4.8019                 |
| 160207            | 7:39            | 14.8527     | -24.7934     | 1.3413  | 268.3895       | 9.6788                 | 5.8084                     | 0.3612                  | 47.5668       | 4.7567                 |
| 160208            | 18:31           | 14.8762     | -24.7528     | 1.3728  | 271.6642       | 3.3723                 | 5.8082                     | 0.6093                  | 43.1923       | 4.3192                 |
| 160210            | 4:08            | 14.7784     | -24.7459     | 0.82808 | 257.298        | 7.8273                 | 6.4003                     | 0.702                   | 43.5143       | 4.3514                 |
| 160210            | 4:15            | 14.7741     | -24.7653     | 1.5436  | 257.298        | 4.11                   | 6.4003                     | 0.4539                  | 45.6564       | 4.5656                 |
| 160213            | 0:32            | 14.6154     | -25.0259     | 2.9126  | 249.2453       | 8.0527                 | 6.5584                     | 0.8901                  | 77.6893       | 7.7689                 |
| 160213            | 21:25           | 14.8532     | -24.7536     | 1.7267  | 268.2919       | 7.4295                 | 6.1603                     | 0.8164                  | 43.2837       | 4.3284                 |
| 160213            | 21:29           | 14.7146     | -24.7199     | 1.1017  | 247.264        | 12.3913                | 6.0510                     | 0.5074                  | 43.0069       | 4.3007                 |
| 160218            | 0:18            | 14.8523     | -24.8062     | 2.2889  | 268.3895       | 6.497                  | 5.8084                     | 0.5957                  | 48.9451       | 4.8945                 |
| 160218            | 14:10           | 14.8769     | -24.7826     | 1.4286  | 271.6642       | 3.2747                 | 5.8082                     | 0.3299                  | 46.4001       | 4.6400                 |
| 160218            | 22:57           | 14.8258     | -24.7939     | 1.7161  | 264.8312       | 6.9338                 | 6.1380                     | 0.4195                  | 47.8024       | 4.7802                 |
| 160218            | 22:59           | 14.8259     | -24.7936     | 1.565   | 264.8312       | 7.5332                 | 6.1380                     | 0.8387                  | 47.7693       | 4.7769                 |
| 160219            | 22:14           | 14.8533     | -24.7949     | 1.3424  | 268.4765       | 6.4515                 | 5.4945                     | 0.6658                  | 47.7262       | 4.7726                 |
| 160219            | 23:03           | 14.8538     | -24.7545     | 1.8407  | 268.3895       | 11.0915                | 5.8084                     | 0.7491                  | 43.3785       | 4.8490                 |
| 160219            | 23:07           | 14.8768     | -24.7775     | 0.8958  | 271.6642       | 10.8018                | 5.8082                     | 0.7493                  | 45.8512       | 4.5851                 |
| 160220            | 1:48            | 14.8546     | -24.7258     | 1.3711  | 268.3895       | 6.9815                 | 5.8084                     | 0.3519                  | 40.2885       | 4.0288                 |
| 160220            | 6:08            | 14.8526     | -24.7968     | 2.2732  | 268.3895       | 6.9815                 | 5.8084                     | 0.7491                  | 47.9329       | 4.7933                 |
| 160221            | 6:26            | 14.7927     | -24.6811     | 0.90445 | 257.298        | 7.5332                 | 6.4003                     | 1.0078                  | 36.361        | 3.6361                 |
| 160221            | 6:47            | 14.8055     | -24.7793     | 1.268   | 261.8925       | 14.6285                | 5.7526                     | 0.725                   | 46.5053       | 4.6505                 |
| 160227            | 18:01           | 14.8559     | -24.6631     | 1.4088  | 268.2919       | 8.0483                 | 6.1603                     | 0.8492                  | 33.5393       | 3.3539                 |
| 160301            | 0:12            | 14.91       | -24.6936     | 0.71882 | 277.7244       | 3.6165                 | 5.4466                     | 0.6908                  | 37.1342       | 3.7134                 |
| 160301            | 21:10           | 14.7697     | -24.7849     | 1.6342  | 257.298        | 10.9939                | 6.4003                     | 0.6477                  | 47.8221       | 4.7822                 |
| 160309            | 11:33           | 16.0835     | -25.6128     | 2.3501  | 315.0553       | 10.6182                | 8.4553                     | 1.7866                  | 191.023       | 19.102                 |
| 160312            | 6:11            | 14.8309     | -24.7147     | 0.98357 | 264.4996       | 11.7207                | 6.5306                     | 1.4487                  | 39.2625       | 3.9263                 |
| 160314            | 2:07            | 14.839      | -24.6464     | 0.5922  | 264.8312       | 8.3784                 | 6.1380                     | 0.8387                  | 31.8594       | 3.1859                 |
| 160316            | 5:10            | 14.8069     | -24.7689     | 1.3992  | 261.8925       | 3.8472                 | 5.7526                     | 0.3854                  | 45.3752       | 4.5375                 |
| 160316            | 5:31            | 14.8249     | -24.7505     | 0.94772 | 264.1226       | 13.9002                | 6.9767                     | 1.1024                  | 43.1632       | 4.3163                 |
| 160317            | 4:50            | 14.6572     | -24.9135     | 1.3842  | 249.2453       | 8.0527                 | 6.5584                     | 0.5074                  | 64.7272       | 6.4727                 |
| 160317            | 21:15           | 14.8757     | -24.7344     | 1.6344  | 271.6642       | 7.1646                 | 5.8082                     | 0.7493                  | 41.2115       | 4.1212                 |
| 160319            | 2:48            | 14.8533     | -24.7931     | 1.3731  | 268.4765       | 6.584                  | 5.4945                     | 0.3139                  | 47.5326       | 4.7533                 |
| 160319            | 3:09            | 14.8522     | -24.8104     | 2.0053  | 268.3895       | 7.5271                 | 5.8084                     | 0.7491                  | 49.3973       | 4.9397                 |
| 160322            | 13:31           | 14.7928     | -24.6806     | 2.4331  | 257.298        | 7.5332                 | 6.4003                     | 0.7722                  | 36.306        | 3.6306                 |
| 160407            | 3:40            | 14.6494     | -24.6663     | 0.79371 | 234.8727       | 9.432                  | 6.1614                     | 0.6271                  | 41.4495       | 4.1450                 |
| 160407            | 20:09           | 14.6902     | -24.7246     | 1.9494  | 244.3047       | 12.1481                | 6.7885                     | 0.7373                  | 44.5802       | 4.4580                 |
| 160407            | 21:57           | 14.7208     | -24.742      | 2.1866  | 249.2453       | 11.6171                | 6.5584                     | 0.7347                  | 44.9609       | 4.4961                 |
| 160407            | 22:01           | 14.7634     | -24.7541     | 1.34    | 255.4897       | 11.185                 | 7.2931                     | 0.7347                  | 44.7655       | 4.4765                 |
| 160407            | 22:05           | 14.7183     | -24.7217     | 1.052   | 247.8513       | 12.3923                | 6.9775                     | 0.5768                  | 43.0291       | 4.3029                 |

|        |       |         |          |         |          |         |         |        |          |         |
|--------|-------|---------|----------|---------|----------|---------|---------|--------|----------|---------|
| 160407 | 22:35 | 14.7965 | -24.76   | 1.7298  | 260.2436 | 15.9389 | 6.9121  | 0.5757 | 44.6097  | 4.4610  |
| 160408 | 1:54  | 14.7123 | -24.7367 | 1.7044  | 247.8513 | 12.3923 | 6.9775  | 0.679  | 44.7755  | 4.4776  |
| 160408 | 2:01  | 14.7123 | -24.7365 | 1.9595  | 247.8513 | 12.3923 | 6.9775  | 0.7472 | 44.7556  | 4.4756  |
| 160408 | 2:18  | 14.7707 | -24.7528 | 1.2946  | 256.4528 | 12.1481 | 6.8184  | 0.5897 | 44.4324  | 4.4432  |
| 160409 | 3:15  | 14.7641 | -24.7514 | 0.99789 | 255.4897 | 12.4227 | 7.2931  | 0.786  | 44.4646  | 4.4465  |
| 160409 | 6:38  | 14.7246 | -24.7058 | 1.0095  | 247.8513 | 12.9786 | 6.9775  | 0.9263 | 41.1804  | 4.1180  |
| 160410 | 4:11  | 14.6291 | -24.7213 | 0.71657 | 236.7761 | 12.4692 | 5.8671  | 0.9214 | 47.6118  | 4.7612  |
| 160410 | 23:11 | 14.5935 | -24.6546 | 2.4272  | 227.3876 | 10.4259 | 5.9880  | 0.4905 | 44.3635  | 4.4363  |
| 160411 | 5:31  | 14.7629 | -24.7562 | 1.2133  | 255.4897 | 12.5666 | 7.2931  | 0.786  | 44.9982  | 4.4998  |
| 160413 | 3:46  | 14.7457 | -24.7467 | 1.2841  | 252.7789 | 11.8217 | 6.6992  | 0.5939 | 44.5381  | 4.4538  |
| 160414 | 3:55  | 14.6994 | -24.7312 | 1.7467  | 245.8693 | 11.4287 | 6.4007  | 0.747  | 44.7942  | 4.4794  |
| 160416 | 21:38 | 15.6985 | -26.9677 | 3.5846  | 288.5101 | 29.7718 | 12.8649 | 3.8981 | 295.7287 | 29.5729 |
| 160419 | 0:56  | 14.664  | -24.6796 | 0.90798 | 237.8135 | 14.9654 | 6.3757  | 1.2808 | 41.7439  | 4.1744  |
| 160419 | 1:58  | 14.6973 | -24.7094 | 0.96227 | 244.3047 | 9.432   | 6.7885  | 0.7373 | 42.7644  | 4.2764  |
| 160419 | 2:16  | 14.751  | -24.729  | 0.70199 | 252.7789 | 11.7207 | 6.6992  | 0.5939 | 42.5441  | 4.2544  |
| 160420 | 3:10  | 16.261  | -27.1061 | 2.9745  | 297.9633 | 31.2779 | 10.5717 | 2.9639 | 333.3834 | 33.3383 |
| 160425 | 0:45  | 14.45   | -24.9771 | 3.3239  | 235.7925 | 20.6652 | 6.7289  | 1.8539 | 81.5471  | 8.1547  |
| 160425 | 14:21 | 14.6893 | -24.6082 | 1.4709  | 234.8727 | 14.3726 | 6.1614  | 0.8161 | 33.7909  | 3.3791  |
| 160425 | 14:37 | 14.7237 | -24.6324 | 1.777   | 242.6625 | 10.1164 | 6.2303  | 0.4771 | 34.0409  | 3.4041  |
| 160426 | 22:38 | 14.6266 | -24.9762 | 2.2991  | 248.651  | 23.6786 | 8.2376  | 1.8619 | 72.2491  | 7.2249  |
| 160427 | 3:32  | 14.7787 | -24.7191 | 1.1207  | 256.4528 | 15.7043 | 6.8184  | 1.1609 | 40.6978  | 4.0698  |
| 160427 | 15:59 | 14.8015 | -24.7306 | 1.4263  | 260.2436 | 15.6979 | 6.9121  | 0.6163 | 41.3968  | 4.1397  |
| 160429 | 0:28  | 14.5675 | -25.0444 | 2.1146  | 246.2681 | 21.2681 | 7.4485  | 1.5016 | 81.5542  | 8.1554  |
| 160430 | 3:12  | 14.6212 | -24.7336 | 0.58001 | 236.7761 | 13.7046 | 5.8671  | 0.5336 | 49.1992  | 10.5157 |
| 160501 | 2:40  | 14.8233 | -24.7657 | 0.70121 | 264.1226 | 12.5367 | 6.9767  | 0.5517 | 44.8088  | 4.4809  |
| 160501 | 2:59  | 14.7325 | -25.0297 | 1.5095  | 258.719  | 22.6343 | 7.9793  | 1.2801 | 74.4589  | 7.4459  |
| 160502 | 0:30  | 14.7501 | -24.732  | 1.8755  | 252.7789 | 11.3437 | 6.6992  | 0.6482 | 42.8821  | 4.2882  |
| 160502 | 1:07  | 14.7749 | -24.7353 | 1.0957  | 256.4528 | 15.4956 | 6.8184  | 0.8381 | 42.4919  | 4.2492  |
| 160502 | 3:22  | 14.6808 | -24.7174 | 0.85013 | 242.6625 | 10.5327 | 6.2303  | 0.7472 | 44.3526  | 4.4353  |
| 160503 | 1:56  | 14.6761 | -24.6479 | 1.1942  | 236.7761 | 10.4879 | 5.8671  | 0.5978 | 38.1481  | 3.8148  |
| 160507 | 5:16  | 16.116  | -26.3605 | 2.7058  | 302.9694 | 22.8983 | 10.0416 | 2.4764 | 256.1618 | 25.6162 |
| 160507 | 6:24  | 14.6892 | -24.7267 | 0.77695 | 244.3047 | 8.5122  | 6.7885  | 0.66   | 44.832   | 4.4832  |
| 160508 | 22:59 | 14.7445 | -24.7505 | 1.533   | 252.7789 | 11.8217 | 6.6992  | 0.9573 | 44.9682  | 4.4968  |
| 160509 | 7:21  | 14.7442 | -24.7516 | 2.384   | 252.7789 | 11.3437 | 6.6992  | 0.5939 | 45.0912  | 4.5091  |
| 160510 | 2:04  | 14.7789 | -24.7436 | 1.3455  | 257.298  | 14.6355 | 6.4003  | 0.5764 | 43.2606  | 4.3261  |
| 160510 | 2:13  | 14.7707 | -24.753  | 1.1011  | 256.4528 | 11.6035 | 6.8184  | 0.4747 | 44.4534  | 4.4453  |
| 160510 | 2:27  | 14.7713 | -24.7505 | 0.97197 | 256.4528 | 12.1481 | 6.8184  | 0.6694 | 44.1761  | 4.4176  |
| 160510 | 4:09  | 14.7837 | -24.7219 | 1.3623  | 257.298  | 16.0273 | 6.4003  | 0.7891 | 40.8648  | 4.0865  |
| 160510 | 5:06  | 14.7013 | -24.7267 | 1.1291  | 245.8693 | 10.9966 | 6.4007  | 0.747  | 44.266   | 4.4266  |
| 160510 | 5:13  | 14.6482 | -24.6681 | 2.0503  | 234.8727 | 14.3726 | 6.1614  | 0.8161 | 41.6845  | 4.1685  |
| 160510 | 15:04 | 14.7833 | -24.7235 | 1.5259  | 257.298  | 14.5809 | 6.4003  | 0.4939 | 41.0426  | 4.1043  |
| 160512 | 1:05  | 14.7283 | -24.6867 | 1.3869  | 247.264  | 10.7813 | 6.0510  | 0.5074 | 39.1236  | 3.9124  |
| 160512 | 3:05  | 14.7711 | -24.7512 | 0.72021 | 256.4528 | 13.7903 | 6.8184  | 0.5881 | 44.2546  | 4.4255  |
| 160513 | 0:57  | 14.7876 | -24.7042 | 1.3475  | 257.298  | 11.4287 | 6.4003  | 0.6092 | 38.911   | 3.8911  |
| 160515 | 0:30  | 16.5893 | -26.8019 | 3.4321  | 306.3244 | 32.4438 | 10.9304 | 4.6784 | 324.5913 | 32.4591 |
| 160517 | 11:14 | 14.4216 | -24.8458 | 2.9875  | 227.3876 | 28.1021 | 5.9880  | 2.2496 | 72.4082  | 7.2408  |
| 160521 | 5:26  | 14.6263 | -24.69   | 0.96131 | 234.0961 | 7.1746  | 5.6810  | 0.3702 | 45.0135  | 4.5013  |
| 160522 | 12:50 | 14.7068 | -24.7504 | 1.527   | 247.8513 | 15.3385 | 6.9775  | 1.1016 | 46.3715  | 4.6372  |
| 160522 | 19:45 | 14.6831 | -24.6705 | 1.7319  | 239.6309 | 20.6127 | 6.0512  | 1.2419 | 39.8071  | 3.9807  |
| 160522 | 22:31 | 14.6812 | -24.6736 | 1.1024  | 239.6309 | 20.6127 | 6.0512  | 1.6053 | 40.2014  | 4.0201  |
| 160523 | 22:38 | 15.7492 | -25.8772 | 3.6953  | 301.0374 | 49.4347 | 11.6244 | 4.1014 | 190.8191 | 19.0819 |
| 160524 | 0:44  | 15.2044 | -26.1221 | 1.7345  | 281.3822 | 24.324  | 13.2999 | 2.3119 | 194.0513 | 19.4051 |
| 160525 | 2:52  | 14.5579 | -24.9527 | 1.9433  | 242.3708 | 20.2327 | 8.5828  | 1.1737 | 73.1187  | 7.3119  |
| 160526 | 19:16 | 14.498  | -24.9285 | 2.1857  | 236.8986 | 21.8204 | 7.4091  | 1.1737 | 74.2382  | 7.4238  |
| 160529 | 22:08 | 18.4015 | -24.2123 | 3.5022  | 2.1545   | 7.0326  | 7.5190  | 4.4058 | 391.6305 | 39.1631 |
| 160530 | 4:01  | 15.7194 | -26.0248 | 3.0876  | 297.9633 | 31.2779 | 10.5717 | 4.0327 | 203.0461 | 20.3046 |
| 160530 | 6:10  | 14.6888 | -24.7016 | 2.295   | 242.6625 | 13.7903 | 6.2303  | 0.7472 | 42.4344  | 4.2434  |
| 160530 | 21:14 | 14.7771 | -24.7518 | 1.0707  | 257.298  | 14.5809 | 6.4003  | 0.5764 | 44.1656  | 4.4166  |
| 160601 | 22:40 | 14.7086 | -24.7347 | 1.3086  | 247.264  | 17.2356 | 6.0510  | 0.7674 | 44.7335  | 4.4734  |
| 160602 | 11:33 | 14.7238 | -24.734  | 2.1872  | 249.2453 | 14.3726 | 6.5584  | 0.7347 | 44.0377  | 4.4038  |
| 160602 | 11:59 | 14.7585 | -24.7043 | 1.5432  | 252.7789 | 19.2295 | 6.6992  | 0.8321 | 39.7581  | 3.9758  |
| 160602 | 22:52 | 15.1236 | -24.0391 | 1.532   | 49.5709  | 11.3627 | 5.7275  | 1.2395 | 44.1284  | 4.4128  |
| 160604 | 0:37  | 14.6538 | -24.6827 | 1.4561  | 236.7761 | 12.4692 | 5.8671  | 1.1107 | 42.6358  | 4.2636  |
| 160604 | 3:40  | 14.6438 | -24.6983 | 0.91473 | 236.7761 | 12.4692 | 5.8671  | 0.9214 | 44.6478  | 4.4648  |
| 160604 | 5:33  | 14.6705 | -24.7379 | 1.0948  | 242.6625 | 10.5327 | 6.2303  | 0.7472 | 46.8375  | 4.6837  |

|        |       |         |          |         |          |         |         |        |          |         |
|--------|-------|---------|----------|---------|----------|---------|---------|--------|----------|---------|
| 160605 | 0:29  | 14.7771 | -24.7261 | 0.76947 | 256.4528 | 13.7903 | 6.8184  | 0.6346 | 41.4719  | 4.1472  |
| 160605 | 18:49 | 14.6482 | -24.6915 | 2.6259  | 236.7761 | 11.7761 | 5.8671  | 0.7338 | 43.7683  | 4.3768  |
| 160607 | 1:13  | 14.7651 | -24.7769 | 0.72306 | 256.4528 | 19.4887 | 6.8184  | 0.7100 | 47.1001  | 4.7100  |
| 160607 | 14:06 | 15.4714 | -25.9852 | 2.1451  | 291.1247 | 25.457  | 14.6044 | 2.9800 | 187.9336 | 18.7934 |
| 160608 | 16:46 | 14.7004 | -24.7547 | 1.7682  | 247.264  | 15.6779 | 6.0510  | 0.6482 | 47.0707  | 4.7071  |
| 160610 | 4:48  | 14.6442 | -24.6978 | 1.8215  | 236.7761 | 10.4879 | 5.8671  | 0.3717 | 44.5785  | 4.4579  |
| 160611 | 18:06 | 16.6013 | -26.4857 | 3.2148  | 310.3141 | 36.4335 | 11.9383 | 5.9084 | 298.689  | 29.8689 |
| 160615 | 2:51  | 14.7767 | -24.7275 | 0.98582 | 256.4528 | 13.7903 | 6.8184  | 0.7674 | 41.6288  | 4.1629  |
| 160722 | 22:41 | 14.8272 | -24.7025 | 1.6353  | 263.6904 | 8.4667  | 7.4878  | 0.5913 | 37.9992  | 3.7999  |
| 160723 | 2:03  | 16.3241 | -25.6611 | 2.5418  | 319.1524 | 18.115  | 10.2402 | 2.6192 | 213.971  | 21.3971 |
| 160725 | 3:23  | 16.1843 | -25.9016 | 2.2214  | 311.4821 | 8.5127  | 8.9668  | 1.9636 | 221.2609 | 22.1261 |
| 160729 | 6:49  | 14.7072 | -24.7382 | 1.3539  | 247.264  | 13.5984 | 6.0510  | 0.7674 | 45.141   | 4.5141  |
| 160729 | 18:14 | 14.7991 | -24.652  | 1.3231  | 257.298  | 7.2016  | 6.4003  | 0.5530 | 33.1493  | 3.3149  |
| 160801 | 15:04 | 14.8304 | -24.7194 | 0.95865 | 264.4996 | 11.4419 | 6.5306  | 0.9978 | 39.7723  | 3.9772  |
| 160801 | 15:05 | 14.7604 | -24.698  | 1.5455  | 252.7789 | 11.7207 | 6.6992  | 0.9645 | 39.0499  | 3.9050  |
| 160801 | 15:07 | 14.7832 | -24.7238 | 1.2013  | 257.298  | 10.034  | 6.4003  | 0.7722 | 41.0782  | 4.1078  |
| 160801 | 15:18 | 14.8226 | -24.7152 | 2.1054  | 263.1898 | 19.1225 | 8.0791  | 1.5978 | 39.4112  | 3.9411  |
| 160801 | 17:44 | 14.9633 | -24.722  | 1.2987  | 285.2888 | 13.5238 | 5.9449  | 0.9659 | 41.3023  | 4.1302  |
| 160801 | 19:21 | 14.8266 | -24.7337 | 1.4924  | 264.1226 | 18.1897 | 6.9767  | 1.8592 | 41.3438  | 4.1344  |
| 160801 | 21:06 | 14.8056 | -24.73   | 1.4563  | 260.8624 | 7.3193  | 6.4776  | 0.5312 | 41.2590  | 4.1259  |
| 160801 | 23:14 | 14.7811 | -24.7335 | 0.99048 | 257.298  | 7.5332  | 6.4003  | 0.5118 | 42.1447  | 4.2145  |
| 160801 | 23:24 | 14.7912 | -24.6446 | 0.4982  | 255.4897 | 9.6204  | 7.2931  | 0.9918 | 32.5770  | 5.9298  |
| 160802 | 0:18  | 14.8329 | -24.7579 | 1.1416  | 265.3877 | 6.677   | 5.4787  | 0.6593 | 43.8747  | 4.3875  |
| 160802 | 1:10  | 14.8295 | -24.7285 | 2.8076  | 264.4996 | 11.7207 | 6.5306  | 0.9978 | 40.7593  | 4.0759  |
| 160802 | 1:12  | 14.8313 | -24.7102 | 0.87376 | 264.4996 | 7.5088  | 6.5306  | 0.4789 | 38.7735  | 3.8773  |
| 160802 | 1:12  | 14.8345 | -24.7178 | 1.4701  | 265.1253 | 6.6397  | 5.7897  | 0.7678 | 39.5602  | 3.9560  |
| 160802 | 1:13  | 14.8069 | -24.7223 | 1.6018  | 260.8624 | 10.3817 | 6.4776  | 0.725  | 40.4163  | 4.0416  |
| 160802 | 1:15  | 14.877  | -24.7318 | 0.5466  | 271.8789 | 7.9404  | 6.5573  | 0.4522 | 40.9344  | 4.0934  |
| 160802 | 1:23  | 14.7802 | -24.7129 | 0.47742 | 256.4528 | 44.7829 | 6.8184  | 3.1361 | 40.0132  | 4.0013  |
| 160802 | 1:43  | 14.807  | -24.7211 | 0.83266 | 260.8624 | 7.3193  | 6.4776  | 0.4991 | 40.2894  | 4.0289  |
| 160802 | 1:55  | 14.7837 | -24.7215 | 1.0727  | 257.298  | 6.8173  | 6.4003  | 0.553  | 40.8212  | 4.0821  |
| 160802 | 2:10  | 14.7851 | -24.7153 | 1.6516  | 257.298  | 8.0527  | 6.4003  | 0.5764 | 40.1378  | 4.0138  |
| 160802 | 2:11  | 14.8316 | -24.7301 | 1.8772  | 264.8312 | 10.067  | 6.1380  | 0.4397 | 40.9017  | 4.0902  |
| 160802 | 2:41  | 14.8306 | -24.718  | 1.0967  | 264.4996 | 10.669  | 6.5306  | 0.5012 | 39.6170  | 3.9617  |
| 160802 | 2:41  | 14.8298 | -24.7262 | 2.0286  | 264.4996 | 8.0468  | 6.5306  | 0.4789 | 40.5067  | 4.0507  |
| 160802 | 2:43  | 14.7846 | -24.7175 | 1.1435  | 257.298  | 11.4287 | 6.4003  | 0.5764 | 40.3814  | 4.0381  |
| 160802 | 2:44  | 14.8298 | -24.7256 | 1.0907  | 264.4996 | 8.0468  | 6.5306  | 0.4461 | 40.4419  | 4.0442  |
| 160802 | 2:48  | 14.8065 | -24.7249 | 0.83602 | 260.8624 | 8.0835  | 6.4776  | 0.5319 | 40.6986  | 4.0699  |
| 160804 | 0:18  | 14.914  | -24.7854 | 1.8981  | 276.6566 | 5.302   | 4.6973  | 0.2665 | 46.9909  | 4.6991  |
| 160804 | 9:38  | 14.7505 | -24.7045 | 1.6353  | 251.5821 | 3.1821  | 5.8473  | 0.3997 | 40.0509  | 4.0051  |
| 160804 | 19:05 | 14.4987 | -23.8666 | 2.7889  | 127.7594 | 24.8491 | 17.8242 | 5.7959 | 66.1279  | 6.6128  |
| 160804 | 19:36 | 14.7837 | -24.7215 | 1.4182  | 257.298  | 6.8173  | 6.4003  | 0.4539 | 40.8228  | 4.0823  |
| 160805 | 4:20  | 14.8296 | -24.7284 | 2.6242  | 264.4996 | 8.0468  | 6.5306  | 0.4789 | 40.7441  | 4.0744  |
| 160805 | 4:43  | 14.8066 | -24.7239 | 1.4587  | 260.8624 | 7.0318  | 6.4776  | 0.4482 | 40.5920  | 4.0592  |
| 160805 | 4:52  | 14.8539 | -24.7297 | 1.5965  | 268.2919 | 6.9333  | 6.1603  | 0.3972 | 40.7104  | 4.0710  |
| 160806 | 4:16  | 14.7806 | -24.7606 | 0.5     | 258.0453 | 6.7859  | 6.0294  | 0.4482 | 45.0075  | 4.5008  |
| 160807 | 22:41 | 14.8534 | -24.7444 | 0.91995 | 268.2919 | 3.587   | 6.1603  | 0.3972 | 42.2934  | 4.2293  |
| 160809 | 22:37 | 14.8274 | -24.7758 | 1.6137  | 264.8312 | 3.5583  | 6.1380  | 0.3483 | 45.8462  | 4.5846  |
| 160809 | 23:03 | 14.8262 | -24.7902 | 2.0909  | 264.8312 | 3.5583  | 6.1380  | 0.3483 | 47.4018  | 4.7402  |
| 160810 | 6:01  | 14.8756 | -24.7311 | 0.78256 | 271.6642 | 3.2747  | 5.8082  | 0.3519 | 40.8562  | 4.0856  |
| 160812 | 6:51  | 14.8065 | -24.7245 | 1.3916  | 260.8624 | 3.6372  | 6.4776  | 0.0773 | 40.6575  | 4.0658  |
| 160812 | 7:40  | 14.7404 | -24.7124 | 1.0533  | 250.4807 | 6.289   | 6.1838  | 0.5154 | 41.2199  | 4.1220  |
| 160813 | 1:11  | 14.8528 | -24.7417 | 1.2132  | 268.1817 | 7.3193  | 6.5575  | 0.0799 | 42.0051  | 4.2005  |
| 160813 | 17:57 | 14.8287 | -24.7371 | 1.2771  | 264.4996 | 7.3793  | 6.5306  | 0.3926 | 41.6858  | 4.1686  |
| 160814 | 2:55  | 14.8523 | -24.7307 | 1.7017  | 268.0563 | 7.8127  | 7.0095  | 0.4789 | 40.8239  | 4.0824  |
| 160814 | 4:03  | 14.7635 | -24.6879 | 0.7106  | 252.7789 | 4.5191  | 6.6992  | 0.5154 | 37.9077  | 3.7908  |
| 160815 | 5:28  | 14.7381 | -24.891  | 0.24    | 256.4528 | 3.7908  | 6.8184  | 0.5897 | 59.7437  | 5.9744  |
| 160815 | 23:04 | 14.794  | -24.7747 | 0.55602 | 260.2436 | 7.4647  | 6.9121  | 0.2129 | 46.2162  | 4.6216  |
| 160818 | 1:39  | 14.8299 | -24.7247 | 1.2392  | 264.4996 | 8.0468  | 6.5306  | 0.4789 | 40.3445  | 4.0345  |
| 160820 | 6:09  | 14.7688 | -24.6305 | 1.2007  | 250.4807 | 6.8173  | 6.1838  | 0.5154 | 31.8584  | 3.1858  |
| 160820 | 6:18  | 14.8029 | -24.635  | 1.2685  | 257.298  | 6.8173  | 6.4003  | 0.5118 | 31.2716  | 3.1272  |
| 160821 | 1:10  | 14.8539 | -24.6857 | 1.2646  | 268.0563 | 8.3221  | 7.0095  | 0.5189 | 35.9776  | 3.5978  |
| 160825 | 19:23 | 14.8264 | -24.7616 | 2.0132  | 264.4996 | 11.7207 | 6.5306  | 0.9572 | 44.3351  | 4.4335  |
| 160828 | 2:49  | 14.8145 | -24.6742 | 1.4126  | 260.8624 | 7.4295  | 6.4776  | 0.4991 | 35.1711  | 3.5171  |
| 160828 | 4:46  | 14.8283 | -24.717  | 1.3333  | 264.1226 | 8.6329  | 6.9767  | 0.5517 | 39.5378  | 3.9538  |

|        |       |         |          |         |          |         |         |        |          |         |
|--------|-------|---------|----------|---------|----------|---------|---------|--------|----------|---------|
| 160830 | 1:24  | 16.2166 | -26.0218 | 2.8412  | 310.0708 | 12.7363 | 6.2264  | 1.7472 | 233.3716 | 23.3372 |
| 160830 | 2:30  | 14.8277 | -24.7483 | 1.0692  | 264.4996 | 7.5088  | 6.5306  | 0.778  | 42.8964  | 4.2896  |
| 160901 | 1:31  | 14.6433 | -24.6877 | 1.1707  | 235.8922 | 9.6767  | 5.4323  | 0.4741 | 43.7291  | 4.3729  |
| 160904 | 1:41  | 14.8271 | -24.7288 | 1.8523  | 264.1226 | 11.3437 | 6.9767  | 0.8387 | 40.8148  | 4.0815  |
| 160911 | 19:51 | 14.7998 | -24.7407 | 1.7303  | 260.2436 | 7.4647  | 6.9121  | 0.6108 | 42.5002  | 4.2500  |
| 160912 | 1:27  | 15.3747 | -25.9371 | 2.4626  | 288.5101 | 26.5525 | 12.8649 | 3.8981 | 179.5081 | 17.9508 |
| 160914 | 2:25  | 14.7927 | -24.6386 | 0.84363 | 255.4897 | 20.8887 | 7.2931  | 0.8924 | 31.915   | 3.915   |
| 160915 | 22:27 | 14.7639 | -24.6864 | 1.3692  | 252.7789 | 8.0835  | 6.6992  | 0.7089 | 37.7404  | 3.7740  |
| 160917 | 2:59  | 14.8765 | -24.7145 | 1.1594  | 271.8789 | 7.7563  | 6.5573  | 0.4522 | 39.0735  | 3.9074  |
| 160917 | 3:11  | 14.724  | -24.6748 | 0.31155 | 245.8693 | 10.9966 | 6.4007  | 0.5768 | 38.1384  | 3.8138  |
| 160917 | 4:54  | 14.8543 | -24.6967 | 0.44183 | 268.1817 | 7.3788  | 6.5575  | 0.452  | 37.1592  | 3.7159  |
| 160918 | 4:15  | 16.2398 | -25.7758 | 2.3243  | 315.0626 | 12.0932 | 9.5826  | 1.6098 | 215.5796 | 21.5580 |
| 160923 | 20:55 | 14.9688 | -24.6952 | 1.3825  | 287.2802 | 11.3387 | 6.6970  | 0.9642 | 38.706   | 4.5816  |
| 160924 | 11:24 | 14.8744 | -24.627  | 1.4724  | 272.0084 | 23.849  | 7.0093  | 1.1053 | 29.6549  | 2.9655  |
| 160925 | 22:35 | 14.8782 | -24.744  | 0.69915 | 272.0084 | 7.8858  | 7.0093  | 0.5328 | 42.2525  | 4.2252  |
| 160925 | 22:49 | 14.8785 | -24.7539 | 1.0187  | 272.0084 | 7.8858  | 7.0093  | 0.5328 | 43.3184  | 4.3318  |
| 160925 | 23:44 | 14.7262 | -24.7275 | 1.0266  | 249.2453 | 11.4318 | 6.5584  | 0.6520 | 43.2891  | 4.3289  |
| 160926 | 4:00  | 14.8294 | -24.7062 | 0.8629  | 264.1226 | 12.5367 | 6.9767  | 0.5764 | 38.369   | 3.8369  |
| 160926 | 0:53  | 14.8526 | -24.698  | 0.77707 | 267.9124 | 8.466   | 7.5284  | 0.6163 | 37.3057  | 3.7306  |
| 160928 | 0:24  | 14.7753 | -24.7336 | 1.9092  | 256.4528 | 8.0468  | 6.8184  | 0.5897 | 42.3036  | 4.2304  |
| 160928 | 0:45  | 14.8018 | -24.7283 | 0.842   | 260.2436 | 7.4647  | 6.9121  | 0.5118 | 41.1472  | 4.1147  |
| 160928 | 1:43  | 14.9564 | -24.7404 | 0.5125  | 283.6084 | 7.6669  | 6.8167  | 0.6701 | 43.0336  | 4.3034  |
| 160929 | 0:41  | 14.7982 | -24.75   | 0.80886 | 260.2436 | 15.9389 | 6.9121  | 0.6163 | 43.5169  | 4.3517  |
| 161020 | 15:39 | 14.8348 | -24.6729 | 1.0771  | 264.4996 | 7.3793  | 6.5306  | 0.4789 | 34.7428  | 3.4743  |
| 161022 | 1:56  | 14.5948 | -24.8138 | 1.8106  | 239.0473 | 8.804   | 6.9778  | 1.0023 | 58.0697  | 5.8070  |
| 161022 | 21:07 | 14.8229 | -24.7695 | 1.4765  | 264.1226 | 12.2558 | 6.9767  | 0.5517 | 45.2202  | 4.5220  |
| 161022 | 21:41 | 14.7609 | -24.7642 | 1.2968  | 255.4897 | 8.6329  | 7.2931  | 0.8928 | 45.8875  | 4.5888  |
| 161025 | 1:16  | 14.7349 | -24.7822 | 0.62112 | 252.7789 | 8.0835  | 6.6992  | 0.5939 | 48.5431  | 4.8543  |
| 161027 | 21:34 | 14.8778 | -24.7043 | 1.2732  | 272.1571 | 8.3743  | 7.5281  | 1.0516 | 37.9814  | 3.7981  |
| 161030 | 5:14  | 14.8785 | -24.7525 | 1.5249  | 272.0084 | 7.8858  | 7.0093  | 0.5191 | 43.1678  | 4.3168  |
| 161030 | 5:20  | 14.8784 | -24.7507 | 1.0167  | 272.0084 | 7.8858  | 7.0093  | 0.9163 | 42.9738  | 4.2974  |
| 161107 | 1:48  | 14.8537 | -24.6925 | 0.36786 | 268.0563 | 7.8127  | 7.0095  | 0.4789 | 36.7097  | 3.6710  |
| 161109 | 20:13 | 14.9266 | -24.7438 | 1.88    | 279.1967 | 11.2843 | 6.4765  | 1.0519 | 42.7455  | 4.2746  |
| 161110 | 9:10  | 14.7261 | -24.7279 | 2.2588  | 249.2453 | 4.9406  | 6.5584  | 0.5893 | 43.3333  | 4.3333  |
| 161112 | 12:19 | 14.8231 | -24.7957 | 2.0217  | 264.4996 | 7.3793  | 6.5306  | 0.7222 | 48.0237  | 4.8024  |
| 161112 | 20:39 | 14.7469 | -24.7427 | 1.4597  | 252.7789 | 4.9276  | 6.6992  | 0.4485 | 44.0874  | 4.4087  |
| 161112 | 21:13 | 14.7761 | -24.7561 | 2.1534  | 257.298  | 4.5191  | 6.4003  | 0.5118 | 44.6415  | 4.4642  |
| 161113 | 1:08  | 14.7976 | -24.7533 | 0.94753 | 260.2436 | 7.9381  | 6.9121  | 0.5757 | 43.8783  | 4.3878  |
| 161113 | 7:06  | 14.588  | -24.8031 | 2.6151  | 237.8135 | 7.8402  | 6.3757  | 0.5086 | 57.4837  | 5.7484  |
| 161117 | 10:43 | 14.7775 | -24.6418 | 1.1971  | 252.7789 | 8.4742  | 6.6992  | 0.5939 | 32.7083  | 3.2708  |
| 161117 | 22:31 | 14.8311 | -24.6893 | 0.77378 | 264.1226 | 8.0345  | 6.9767  | 0.5517 | 36.5402  | 3.6540  |
| 161119 | 10:45 | 14.9064 | -24.7628 | 1.4517  | 275.9415 | 7.8852  | 6.9759  | 0.9478 | 44.4827  | 4.4483  |
| 161121 | 2:40  | 14.7888 | -24.8056 | 1.2315  | 260.2436 | 12.3923 | 6.9121  | 0.7741 | 49.5921  | 4.9592  |
| 161122 | 5:51  | 14.9334 | -24.7593 | 0.93743 | 279.8193 | 7.8109  | 6.9108  | 0.5760 | 44.5137  | 4.4514  |
| 161122 | 5:52  | 14.9065 | -24.7633 | 1.3944  | 275.9415 | 7.8852  | 6.9759  | 0.8829 | 44.5374  | 4.4537  |
| 161129 | 18:33 | 14.8523 | -24.7572 | 1.4232  | 268.1817 | 7.3788  | 6.5575  | 0.4520 | 43.6742  | 4.3674  |
| 161129 | 18:47 | 14.8522 | -24.7611 | 1.9356  | 268.1817 | 7.9381  | 6.5575  | 0.4520 | 44.0941  | 4.4094  |
| 161129 | 20:57 | 14.8237 | -24.7617 | 0.99637 | 264.1226 | 7.8858  | 6.9767  | 0.4461 | 44.376   | 4.4376  |
| 161129 | 21:39 | 14.8781 | -24.768  | 2.1252  | 271.8789 | 7.7563  | 6.5573  | 0.4522 | 44.8335  | 4.4833  |
| 161129 | 22:32 | 14.879  | -24.7669 | 1.4245  | 272.0084 | 7.8858  | 7.0093  | 0.5191 | 44.7184  | 4.4718  |
| 161129 | 23:31 | 14.8521 | -24.763  | 1.1757  | 268.1817 | 4.0591  | 6.5575  | 0.4520 | 44.2988  | 4.4299  |
| 161129 | 23:47 | 14.8795 | -24.7832 | 2.0903  | 272.0084 | 7.8858  | 7.0093  | 0.5188 | 46.4733  | 4.6473  |
| 161130 | 0:11  | 14.8121 | -24.7685 | 1.8456  | 262.6035 | 12.8008 | 8.7709  | 1.9229 | 45.2538  | 4.5254  |
| 161130 | 3:01  | 14.8789 | -24.7658 | 1.1364  | 272.0084 | 7.8109  | 7.0093  | 0.5328 | 44.5997  | 4.4600  |
| 161130 | 3:10  | 14.8786 | -24.7552 | 1.3235  | 272.0084 | 11.7648 | 7.0093  | 0.8719 | 43.4585  | 4.3459  |
| 161130 | 3:16  | 14.8773 | -24.7679 | 0.55032 | 271.765  | 7.2654  | 6.1601  | 0.3974 | 44.8201  | 4.4820  |
| 161130 | 4:13  | 14.8789 | -24.7646 | 1.2311  | 272.0084 | 7.8109  | 7.0093  | 0.8719 | 44.4706  | 4.4471  |
| 161130 | 9:47  | 14.906  | -24.7588 | 1.6889  | 275.9415 | 8.0291  | 6.9759  | 0.5525 | 44.0501  | 4.4050  |
| 161130 | 9:54  | 14.8778 | -24.758  | 1.4294  | 271.8789 | 7.9404  | 6.5573  | 0.4643 | 43.7569  | 4.3757  |
| 161130 | 10:26 | 14.8781 | -24.7682 | 2.266   | 271.8789 | 7.7563  | 6.5573  | 0.4522 | 44.855   | 4.4855  |
| 161130 | 10:54 | 14.8781 | -24.7675 | 2.1991  | 271.8789 | 7.7563  | 6.5573  | 0.4643 | 44.7797  | 4.4780  |
| 161130 | 17:14 | 14.8787 | -24.7605 | 2.3916  | 272.0084 | 7.8858  | 7.0093  | 0.5328 | 44.0289  | 4.4029  |
| 161130 | 17:16 | 14.8511 | -24.7666 | 1.638   | 268.0563 | 8.5204  | 7.0095  | 0.5189 | 44.6899  | 4.4690  |
| 161130 | 18:50 | 14.7966 | -24.7592 | 1.9924  | 260.2436 | 15.9389 | 6.9121  | 0.9240 | 44.523   | 4.4523  |
| 161130 | 19:09 | 14.8785 | -24.7532 | 2.0159  | 272.0084 | 17.5647 | 7.0093  | 1.4669 | 43.2431  | 4.3243  |



|        |       |         |          |         |          |         |        |        |          |         |
|--------|-------|---------|----------|---------|----------|---------|--------|--------|----------|---------|
| 161130 | 20:36 | 14.8796 | -24.7561 | 1.6592  | 272.1571 | 12.6212 | 7.5281 | 0.6173 | 43.5592  | 4.3559  |
| 161130 | 23:43 | 14.8789 | -24.7661 | 1.519   | 272.0084 | 7.8858  | 7.0093 | 0.5191 | 44.632   | 4.4632  |
| 161201 | 1:44  | 14.878  | -24.7649 | 1.2082  | 271.8789 | 7.7563  | 6.5573 | 0.4522 | 44.4997  | 4.4500  |
| 161201 | 1:59  | 14.8788 | -24.7631 | 1.3859  | 272.0084 | 7.8858  | 7.0093 | 0.5328 | 44.3089  | 4.4309  |
| 161201 | 5:10  | 14.7448 | -24.655  | 1.1595  | 247.8513 | 12.3923 | 6.9775 | 0.6790 | 35.2712  | 3.5271  |
| 161202 | 2:37  | 14.8508 | -24.7736 | 1.1481  | 268.0563 | 7.8127  | 7.0095 | 0.5189 | 45.4439  | 4.5444  |
| 161202 | 4:08  | 14.878  | -24.7663 | 1.1319  | 271.8789 | 7.7563  | 6.5573 | 0.4522 | 44.6503  | 4.4650  |
| 161202 | 13:13 | 14.7782 | -24.7468 | 1.348   | 257.298  | 10.8837 | 6.4003 | 0.5764 | 43.6137  | 4.3614  |
| 161202 | 13:18 | 14.8265 | -24.7604 | 1.4347  | 264.4996 | 8.0468  | 6.5306 | 0.4789 | 44.2055  | 4.4206  |
| 161202 | 13:25 | 14.7979 | -24.7515 | 2.039   | 260.2436 | 7.4647  | 6.9121 | 0.5118 | 43.6817  | 4.3682  |
| 161202 | 13:38 | 14.8228 | -24.7712 | 2.6892  | 264.1226 | 12.2558 | 6.9767 | 1.1683 | 45.4034  | 4.5403  |
| 161202 | 17:30 | 14.8265 | -24.7602 | 1.3703  | 264.4996 | 7.2016  | 6.5306 | 0.4461 | 44.1841  | 4.4184  |
| 161203 | 7:35  | 14.7702 | -24.7827 | 1.8923  | 257.298  | 9.4467  | 6.4003 | 0.8928 | 47.5788  | 4.7579  |
| 161204 | 20:55 | 14.7814 | -24.732  | 1.6477  | 257.298  | 8.0527  | 6.4003 | 0.5118 | 41.9815  | 4.1981  |
| 161204 | 21:13 | 14.7767 | -24.7274 | 1.2584  | 256.4528 | 8.6015  | 6.8184 | 0.6346 | 41.6184  | 4.1618  |
| 161204 | 21:14 | 14.805  | -24.7342 | 1.2279  | 260.8624 | 7.4295  | 6.4776 | 0.4991 | 41.7148  | 4.1715  |
| 161205 | 11:13 | 14.7729 | -24.7707 | 2.1377  | 257.298  | 11.4287 | 6.4003 | 0.4539 | 46.2528  | 4.6253  |
| 161205 | 22:40 | 14.7709 | -24.7797 | 1.2534  | 257.298  | 9.4467  | 6.4003 | 0.8928 | 47.2467  | 4.7247  |
| 161207 | 4:25  | 14.879  | -24.7673 | 0.55589 | 272.0084 | 7.8109  | 7.0093 | 0.5328 | 44.7614  | 4.4761  |
| 161207 | 19:27 | 14.8065 | -24.7009 | 1.919   | 260.2436 | 7.9381  | 6.9121 | 0.5757 | 38.1522  | 3.8152  |
| 161212 | 12:55 | 14.7217 | -24.713  | 1.7891  | 247.8513 | 10.0378 | 6.9775 | 0.9263 | 42.0195  | 4.2020  |
| 161213 | 4:16  | 14.8775 | -24.7482 | 1.393   | 271.8789 | 7.7563  | 6.5573 | 0.4522 | 42.7017  | 4.2702  |
| 161215 | 0:27  | 14.8252 | -24.7743 | 0.96214 | 264.4996 | 7.3793  | 6.5306 | 0.4461 | 45.7086  | 4.5709  |
| 161219 | 21:45 | 16.2826 | -25.6656 | 2.581   | 318.2318 | 9.8871  | 7.9728 | 1.6098 | 210.8596 | 21.0860 |
| 161221 | 3:24  | 14.7125 | -24.7011 | 1.0243  | 245.8693 | 6.9096  | 6.4007 | 0.7895 | 41.2433  | 4.1243  |
| 161221 | 6:17  | 14.6573 | -24.9131 | 1.4193  | 249.2453 | 9.6144  | 6.5584 | 0.6520 | 64.683   | 6.4683  |
| 161226 | 6:13  | 14.784  | -24.7205 | 1.4551  | 257.298  | 10.9939 | 6.4003 | 0.6477 | 40.7105  | 4.0710  |
| 161226 | 9:32  | 14.8316 | -24.7295 | 1.5875  | 264.8312 | 7.5332  | 6.1380 | 0.6593 | 40.8411  | 4.0841  |
| 161226 | 13:45 | 14.6222 | -24.9627 | 2.7285  | 247.8513 | 11.6846 | 6.9775 | 1.4850 | 71.0812  | 7.1081  |
| 161227 | 3:54  | 14.7636 | -24.6876 | 1.1065  | 252.7789 | 8.4742  | 6.6992 | 0.5939 | 37.8736  | 3.7874  |
| 161228 | 3:05  | 14.8027 | -24.7233 | 1.6371  | 260.2436 | 8.6577  | 6.9121 | 0.5118 | 40.5998  | 4.0600  |
| 161228 | 6:04  | 14.7838 | -24.6737 | 1.0153  | 255.4897 | 9.2216  | 7.2931 | 0.8928 | 35.8199  | 3.5820  |
| 161229 | 9:13  | 14.8287 | -24.7126 | 2.023   | 264.1226 | 8.6329  | 6.9767 | 1.1024 | 39.0622  | 3.9062  |
